# Supplementary material for: Coupling Remote Sensing Data and AquaCrop Model for Simulation of Winter Wheat Growth under Rainfed and Irrigated Conditions in a Mediterranean Environment
Source: MDPI journal article supplement (doi:10.3390/agronomy11112265), 2021-11-09
Supplement: s1 [file s1]

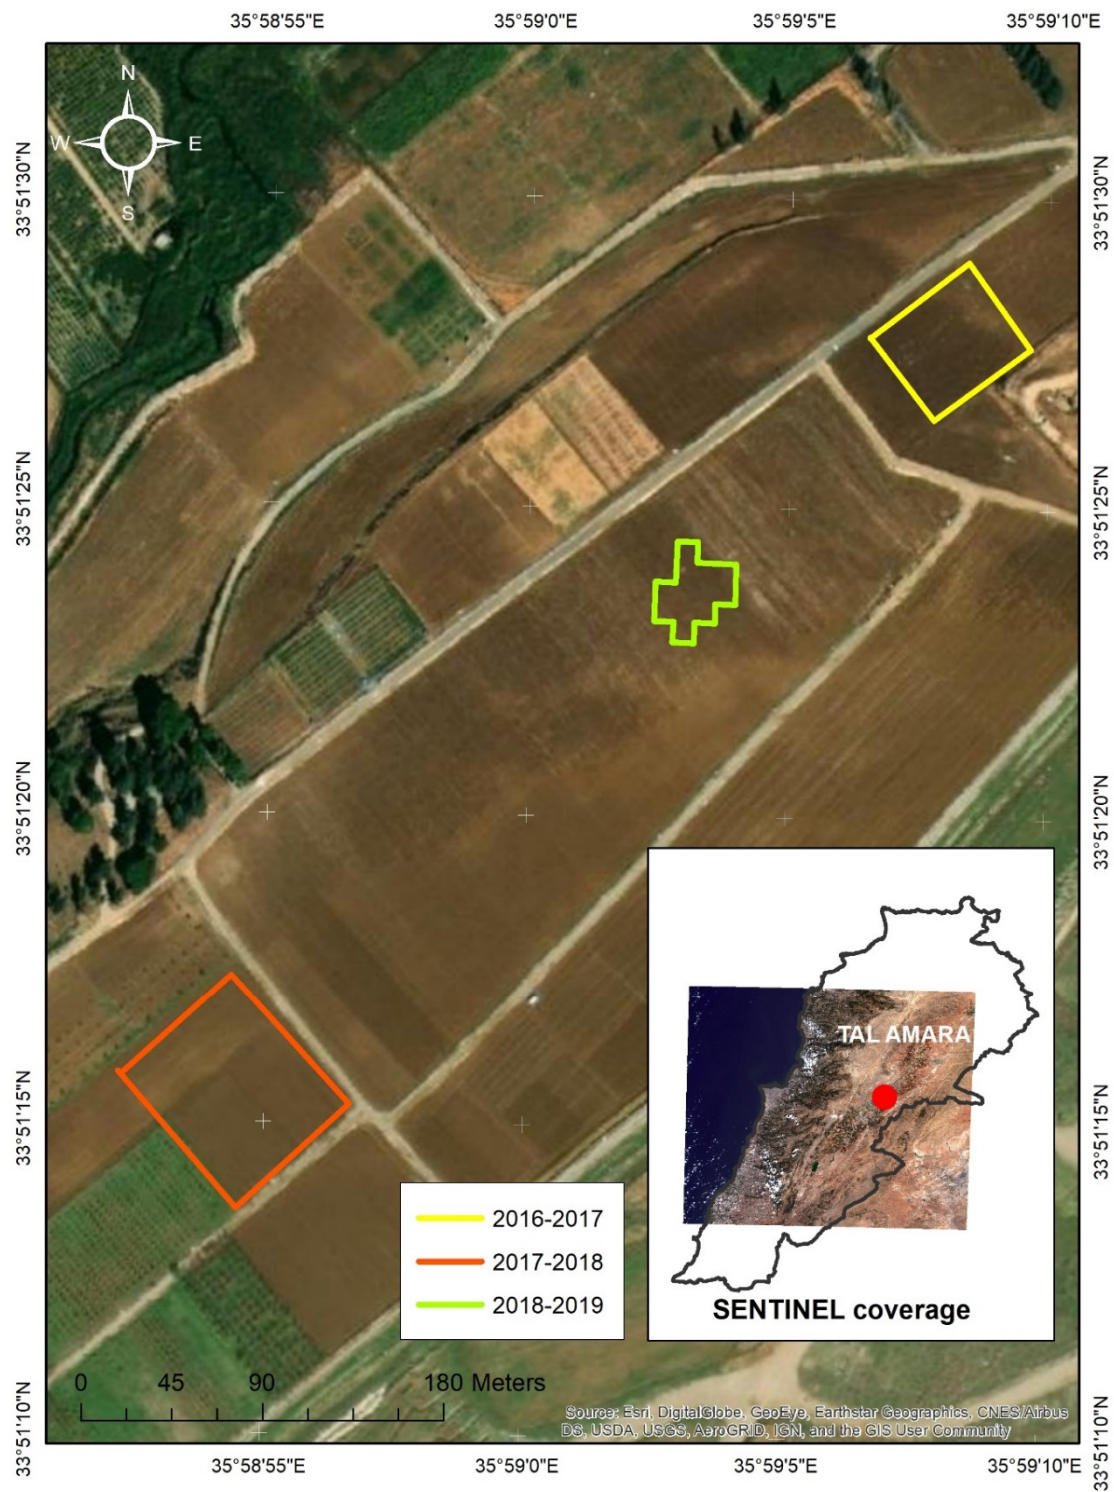

**Figure S1. The location of the study area and the field trials.**

**Table S1. Soil characteristics of the field during the three growing seasons.**

|                                                 | Year 2016–2017        | Year 2017–2018        | Year 2018–2019        |
|-------------------------------------------------|-----------------------|-----------------------|-----------------------|
| Soil properties                                 | 0–90 cm<br>soil depth | 0–90 cm<br>soil depth | 0–90 cm<br>soil depth |
| Texture                                         | Clay                  | Clay                  | Sandy clay loam       |
| Silt (%)                                        | 25                    | 25                    | 22                    |
| Sand (%)                                        | 31                    | 29                    | 45                    |
| Clay (%)                                        | 44                    | 46                    | 33                    |
| Field capacity ( $\text{cm}^3 \text{cm}^{-3}$ ) | 0.41                  | 0.403                 | 0.33                  |
| Wilting point ( $\text{cm}^3 \text{cm}^{-3}$ )  | 0.22                  | 0.277                 | 0.2                   |
| Saturation ( $\text{cm}^3 \text{cm}^{-3}$ )     | 0.52                  | 0.487                 | 0.45                  |
| pH                                              | 8                     | 7.4                   | 8.27                  |
| ECe ( $\text{dS m}^{-1}$ )                      | 0.43                  | 0.17                  | 0.167                 |

**Table S2. Experimental details and dates of the main phenological stages for durum wheat during the growing seasons 2016–2017, 2017–2018 and 2018–2019. In brackets the days after sowing (DAS) are reported.**

|                                    | Durum wheat         |                  |                  |
|------------------------------------|---------------------|------------------|------------------|
| Season                             | 2016–2017           | 2017–2018        | 2018–2019        |
| <b>Sowing</b>                      | 28-Nov-16           | 04-Dec-18        | 07-Nov-18        |
| <b>Booting</b>                     | 18 April 2017 (141) | 29-03-2018 (115) | 03-03-2019 (116) |
| <b>Flowering</b>                   | 8 May 2017 (161)    | 15-04-2018 (132) | 28-04-2019 (172) |
| <b>Grain filling (milk stage)</b>  | 10 May 2017 (163)   | 25-04-2018 (142) | 10-05-2019 (184) |
| <b>Harvesting</b>                  | 5 July 2017 (219)   | 12-06-2018 (190) | 19-06-2019 (224) |
| <b>Length of crop cycle (days)</b> | 219                 | 190              | 224              |

**Table S3. List of Sentinel 2 acquisition dates.**

| 2016–2017 | 2018–2019  |
|-----------|------------|
| 12/12/16  | 22/11/18   |
| 1/1/17    | 17/12/2018 |
| 10/2/17   | 21/1/2019  |
| 20/2/2017 | 5/2/19     |
| 11/4/17   | 12/3/19    |
| 21/4/2017 | 11/4/19    |
| 11/5/17   | 1/5/19     |
| 31/5/2017 | 11/5/19    |
| 10/6/17   | 21/5/2019  |
| 30/6/2017 | 10/6/19    |

**Table S4. Simulation results for the seasons 2016–2017 and 2018–2019 and deviation from measured values after assimilating S2-CC.**

| Variables                     |           | 2016–2017-assimilated S2-CC |           |                | 2018–2019-assimilated S2-CC |           |                |
|-------------------------------|-----------|-----------------------------|-----------|----------------|-----------------------------|-----------|----------------|
|                               |           | Measured                    | Simulated | % of deviation | Measured                    | Simulated | % of deviation |
| Biomass (t.ha <sup>-1</sup> ) | I-100     | 10.73                       | 10.56     | −1.58          | 14.98                       | 15.18     | 1.32           |
|                               | I-50      | —                           | —         | —              | 14.22                       | 14.71     | 3.45           |
|                               | I-rainfed | 8.43                        | 7.65      | −9.25          | 12.19                       | 14.45     | 18.56          |
| Yield (t.ha <sup>-1</sup> )   | I-100     | 3.62                        | 3.82      | 5.52           | 5.27                        | 5.23      | −0.76          |
|                               | I-50      | —                           | —         | —              | 4.78                        | 5.01      | 4.85           |
|                               | I-rainfed | 2.46                        | 2.04      | −17.07         | 4.26                        | 4.78      | 12.17          |
| Canopy cover—CC (%)           | I-100     | 82                          | 80.9      | −1.34          | 77.33                       | 78.8      | 1.9            |
|                               | I-50      | —                           | —         | —              | 77.02                       | 76.4      | −0.8           |
|                               | I-rainfed | 80.2                        | 75.7      | −5.61          | 76.89                       | 75.9      | −1.29          |
