# Supplementary material for: Coupling Remote Sensing Data and AquaCrop Model for Simulation of Winter Wheat Growth under Rainfed and Irrigated Conditions in a Mediterranean Environment
Source: MDPI journal article supplement (doi:10.3390/agronomy11112265), 2021-11-09
Supplement: s1 [file s1]

Archive with 1 entries (1 files):
- agronomy-1423087-supplementary.pdf
